# Supplementary material for: A highly stable MOF with a rod SBU and a tetracarboxylate linker: unusual topology and CO2adsorption behaviour under ambient conditions
Source: Royal Society of Chemistry journal article supplement (doi:10.1039/c3cc49684h), 2014-01-01
Supplement: c3cc49684h2.cgd [file c3cc49684h2.cgd]

CRYSTAL
  NAME "lrk; ROD-6"
  GROUP Cccm
  CELL 7.87476 1.91261 6.89075 90.0000 90.0000 90.0000
  NODE 3 3  0.55596 0.37573 0.50000
  NODE 7 4  0.26863 0.00014 0.17747
  NODE 1 3  0.15318 0.33617 0.07247
  EDGE  0.15318 0.33617 0.07247   0.05596 0.12427 -0.00000
  EDGE  0.55596 0.37573 0.50000   0.44404 0.62427 0.50000
  EDGE  0.26863 0.00014 0.17747   0.26863 -0.00014 0.32253
  EDGE  0.26863 0.00014 0.17747   0.23137 -0.50014 0.17747
  EDGE  0.26863 0.00014 0.17747   0.34682 0.16383 0.07247
  EDGE  0.26863 0.00014 0.17747   0.23137 0.49986 0.17747
  EDGE  0.15318 0.33617 0.07247   0.15318 0.33617 -0.07247
# EDGE_CENTER  0.10457 0.23022 0.03624
# EDGE_CENTER  0.50000 0.50000 0.50000
# EDGE_CENTER  0.26863 -0.00000 0.25000
# EDGE_CENTER  0.25000 -0.25000 0.17747
# EDGE_CENTER  0.30773 0.08198 0.12497
# EDGE_CENTER  0.25000 0.25000 0.17747
# EDGE_CENTER  0.15318 0.33617 0.00000
END

CRYSTAL
  NAME "frz; ROD-7"
  GROUP Cmmm
  CELL 8.47313 1.95254 3.53229 90.0000 90.0000 90.0000
  NODE 3 4  0.26299 0.00000 0.35849
  NODE 2 3  0.44095 0.00000 0.00000
  NODE 1 3  0.33877 0.00000 0.14142
  EDGE  0.33877 0.00000 0.14142   0.26299 0.00000 0.35849
  EDGE  0.33877 0.00000 0.14142   0.33877 0.00000 -0.14142
  EDGE  0.26299 0.00000 0.35849   0.26299 0.00000 0.64151
  EDGE  0.44095 0.00000 0.00000   0.33877 0.00000 0.14142
  EDGE  0.26299 0.00000 0.35849   0.23701 0.50000 0.35849
  EDGE  0.44095 0.00000 0.00000   0.55905 0.00000 -0.00000
# EDGE_CENTER  0.30088 0.00000 0.24995
# EDGE_CENTER  0.33877 0.00000 -0.00000
# EDGE_CENTER  0.26299 0.00000 0.50000
# EDGE_CENTER  0.38986 0.00000 0.07071
# EDGE_CENTER  0.25000 0.25000 0.35849
# EDGE_CENTER  0.50000 0.00000 -0.00000
END

CRYSTAL
  NAME "lrj; basic net of lrk"
  GROUP Cccm
  CELL 5.23705 1.68608 6.17560 90.0000 90.0000 90.0000
  NODE 2 3  0.07317 0.19051 0.41904
  NODE 1 4  0.30135 0.00000 0.16904
  EDGE  0.30135 0.00000 0.16904   0.19865 -0.50000 0.16904
  EDGE  0.07317 0.19051 0.41904   -0.07317 -0.19051 0.41904
  EDGE  0.30135 0.00000 0.16904   0.30135 -0.00000 0.33096
  EDGE  0.07317 0.19051 0.41904   0.07317 0.19051 0.58096
  EDGE  0.30135 0.00000 0.16904   0.42683 -0.30949 0.08096
  EDGE  0.30135 0.00000 0.16904   0.19865 0.50000 0.16904
# EDGE_CENTER  0.25000 -0.25000 0.16904
# EDGE_CENTER  0.00000 -0.00000 0.41904
# EDGE_CENTER  0.30135 -0.00000 0.25000
# EDGE_CENTER  0.07317 0.19051 0.50000
# EDGE_CENTER  0.36409 -0.15474 0.12500
# EDGE_CENTER  0.25000 0.25000 0.16904
END
